# Supplementary material for: Molecular dynamics simulation of α-unsubstituted oligo-thiophenes: dependence of their high-temperature liquid-crystalline phase behaviour on molecular length
Source: Royal Society of Chemistry journal article supplement (doi:10.1039/c9tc02374g), 2019-01-01
Supplement: c9tc02374g1.pdf [file c9tc02374g1.pdf]

## Molecular Dynamics Simulation of $\alpha$ -Unsubstituted Oligo-thiophenes: Dependence of their High-Temperature Liquid-Crystalline Phase Behaviour on Molecular Length

Flora D. Tsourtou,<sup>a</sup> Stavros D. Peroukidis<sup>a,b</sup> and Vlasis G. Mavrantzas<sup>a,c</sup>

a. Department of Chemical Engineering, University of Patras & FORTH/ICE-HT, Patras GR 26504, Greece

b. School of Science / Technology, Natural Sciences, Hellenic Open University, GR-26335, Patras, Greece

c. Particle Technology Laboratory, Department of Mechanical and Process Engineering, ETH Zürich, CH-8092 Zürich, Switzerland

### Electronic Supplementary Information (ESI)

The supplementary information file is organised as follows: in Section 1, the calculated pair correlation functions of  $\alpha$ -unsubstituted oligo-thiophenes with number of thiophene rings  $n = 5 - 8$  ( $\alpha$ -5T,  $\alpha$ -7T,  $\alpha$ -6T and  $\alpha$ -8T) are presented. The atomistic snapshots of the crystal phases from our MD simulations are displayed in Section 2.

### 1. Calculated pair correlation functions of $\alpha$ -unsubstituted oligo-thiophenes.

#### 1.1 Longitudinal $g_{||}(r_{||})$ pair correlation function

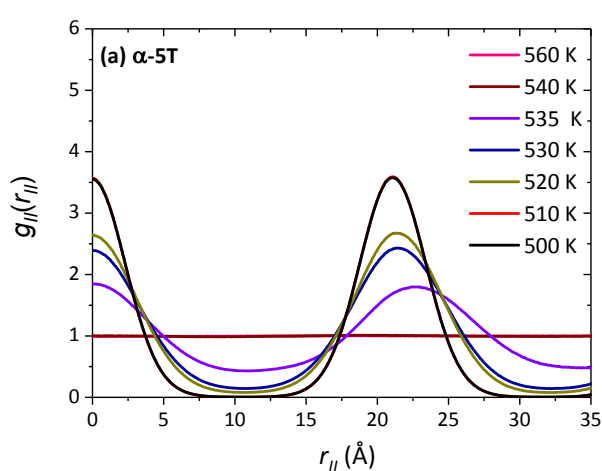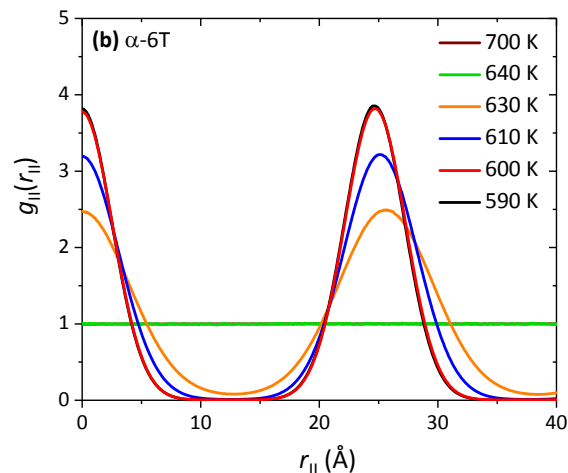

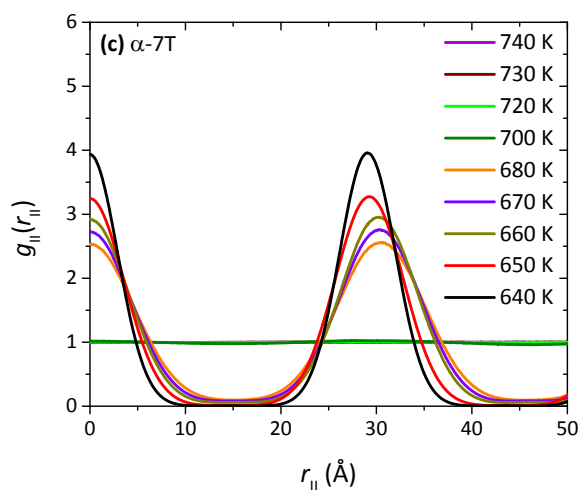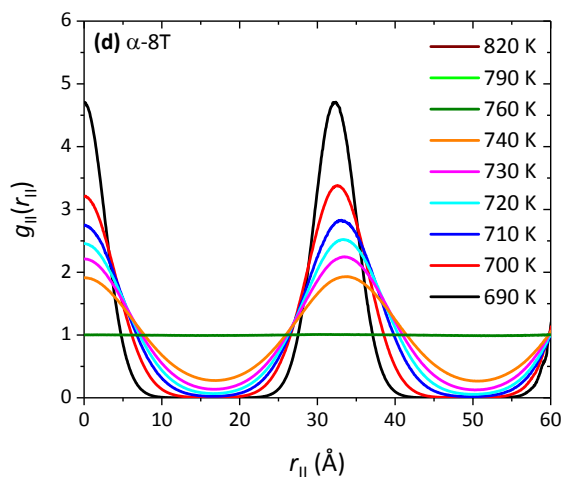

**Fig. S1** Longitudinal pair correlation functions of: (a)  $\alpha$ -5T, (b)  $\alpha$ -6T, (c)  $\alpha$ -7T, and (d)  $\alpha$ -8T at various temperatures (and  $P = 1$  atm) as predicted from our MD simulations.

## 1.2 Perpendicular $g_{\perp}(r_{\perp})$ pair correlation function

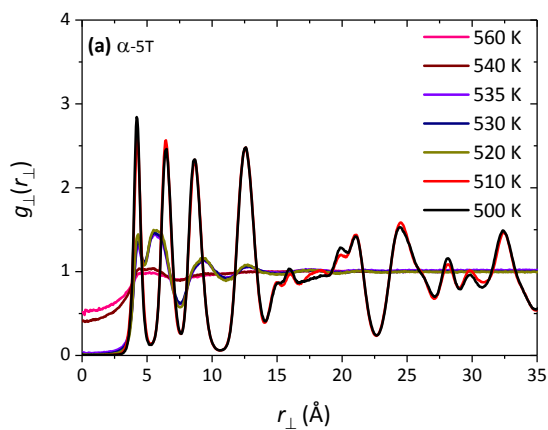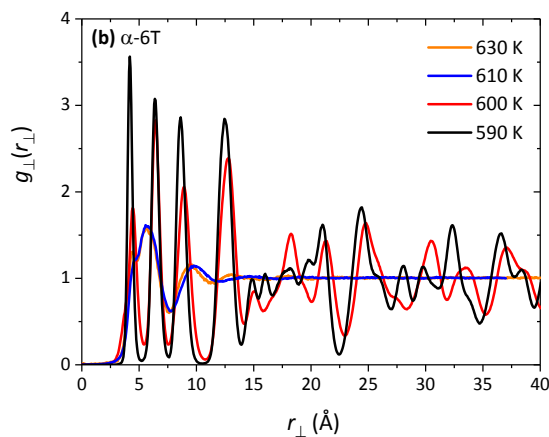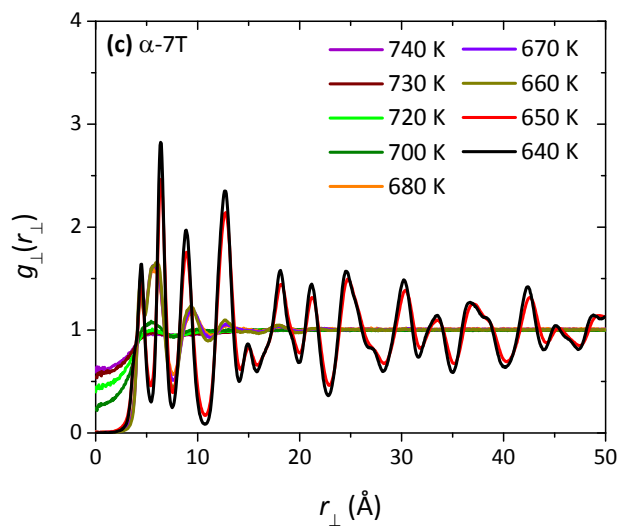

**Fig. S2** Perpendicular pair correlation functions of: (a)  $\alpha$ -5T, (b)  $\alpha$ -6T, (c)  $\alpha$ -7T and (d)  $\alpha$ -8T at various temperatures (and  $P = 1$  atm) as predicted from our MD simulations.

**1.3  $g^{\text{CoM-ring}}(r)$  and  $g_1^{\text{CoM-ring}}(r)$  pair correlation functions**

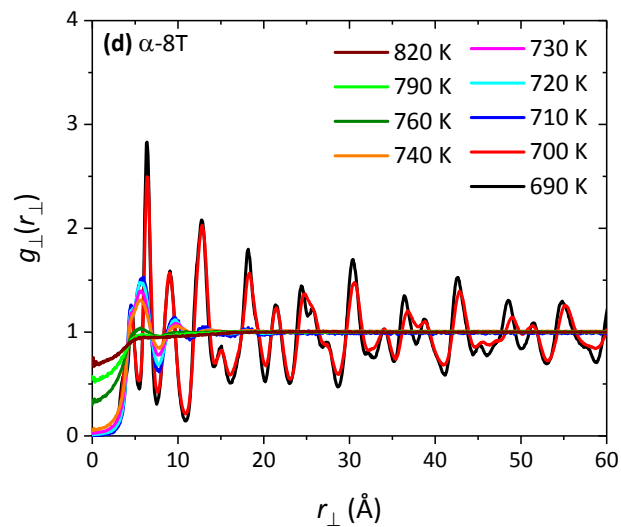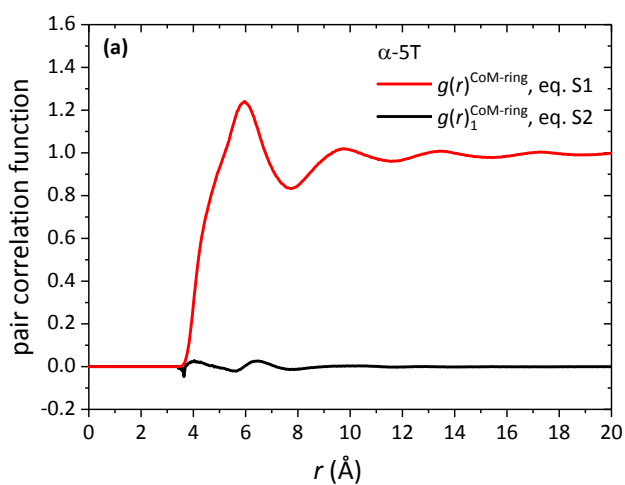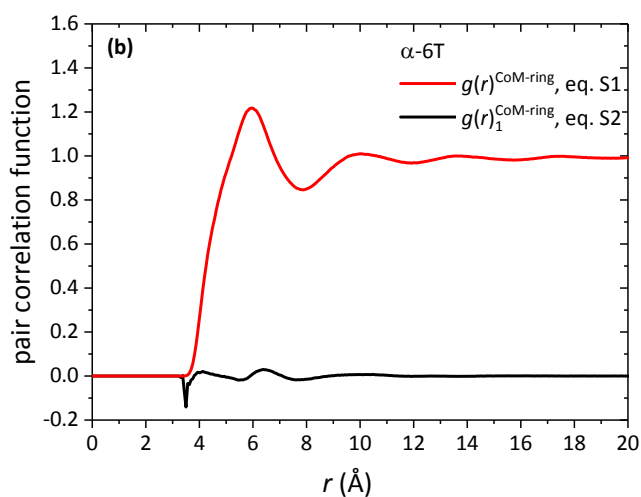

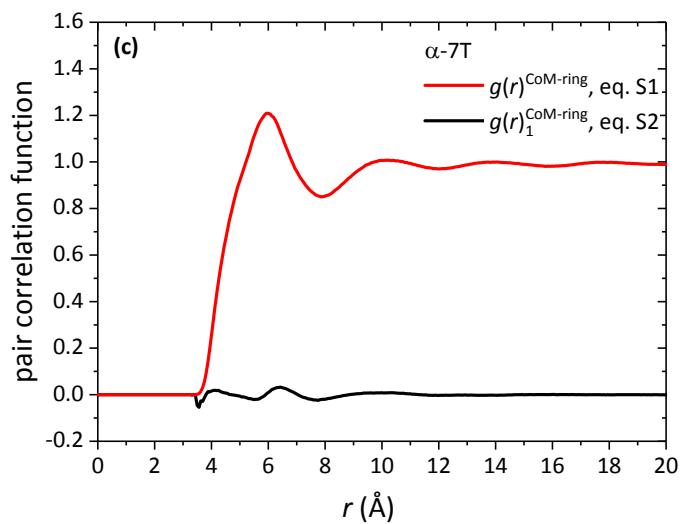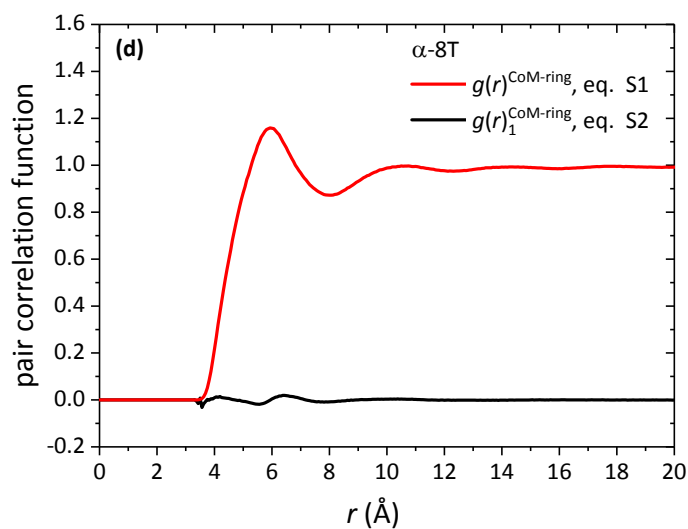

**Fig. S3** Plots of the  $g^{\text{CoM-ring}}(r)$  and  $g_1^{\text{CoM-ring}}(r)$  pair correlation functions corresponding to the smectic-A phases of: (a)  $\alpha$ -5T, (b)  $\alpha$ -6T, (c)  $\alpha$ -7T and (d)  $\alpha$ -8T, at  $T = 530$  K,  $620$  K,  $690$  K, and  $740$  K, respectively, as obtained from our *NPT* MD simulations ( $P = 1$  atm).

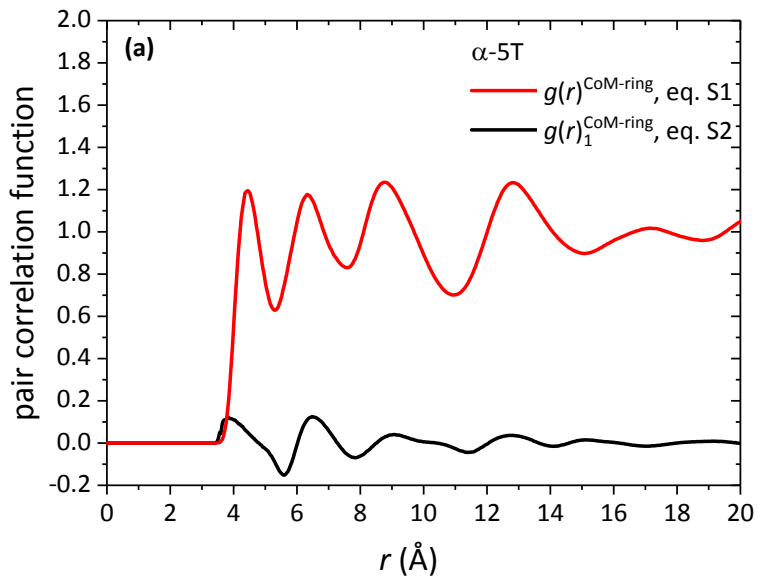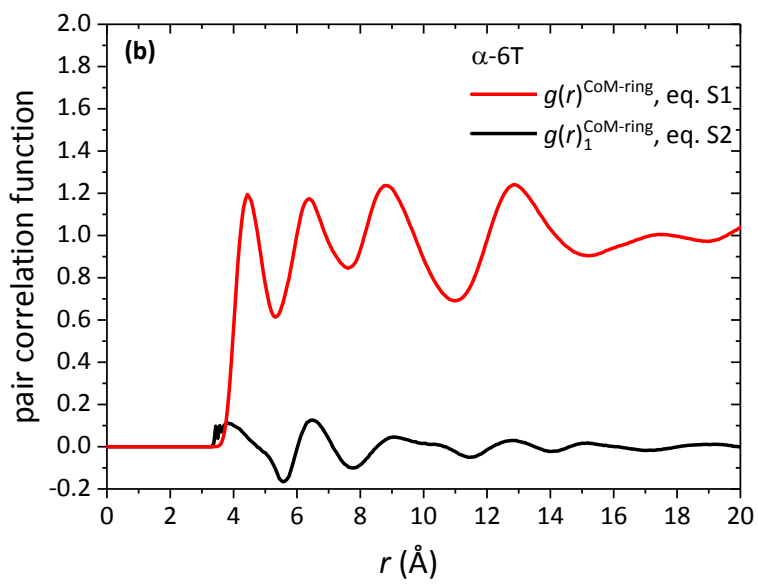

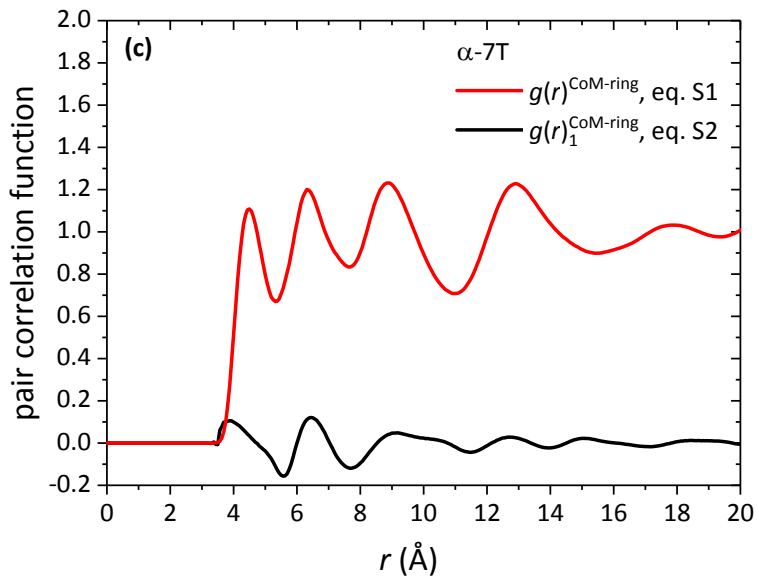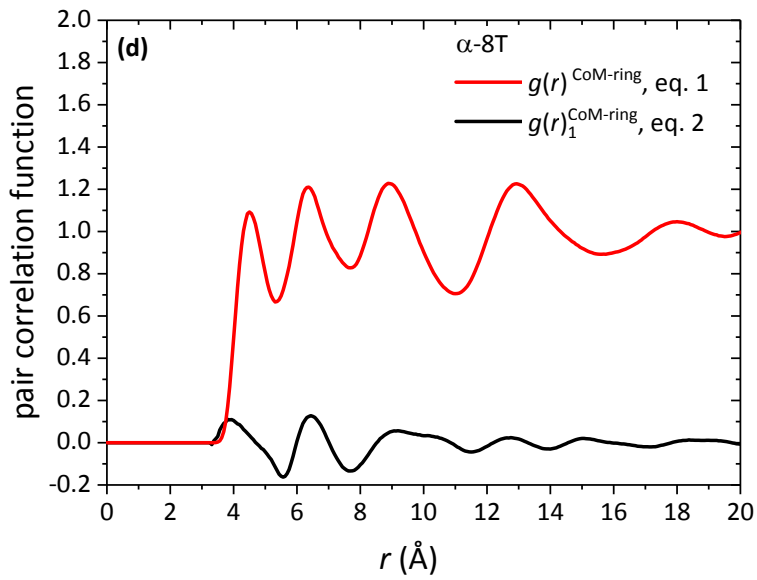

**Fig. S4** Same as with Fig. S4 but for the corresponding crystal phases of  $\alpha$ -5T,  $\alpha$ -6T,  $\alpha$ -7T and  $\alpha$ -8T at  $T = 490$  K,  $590$  K,  $640$  K and  $690$  K, respectively.

## 2. Snapshots of the crystal phases

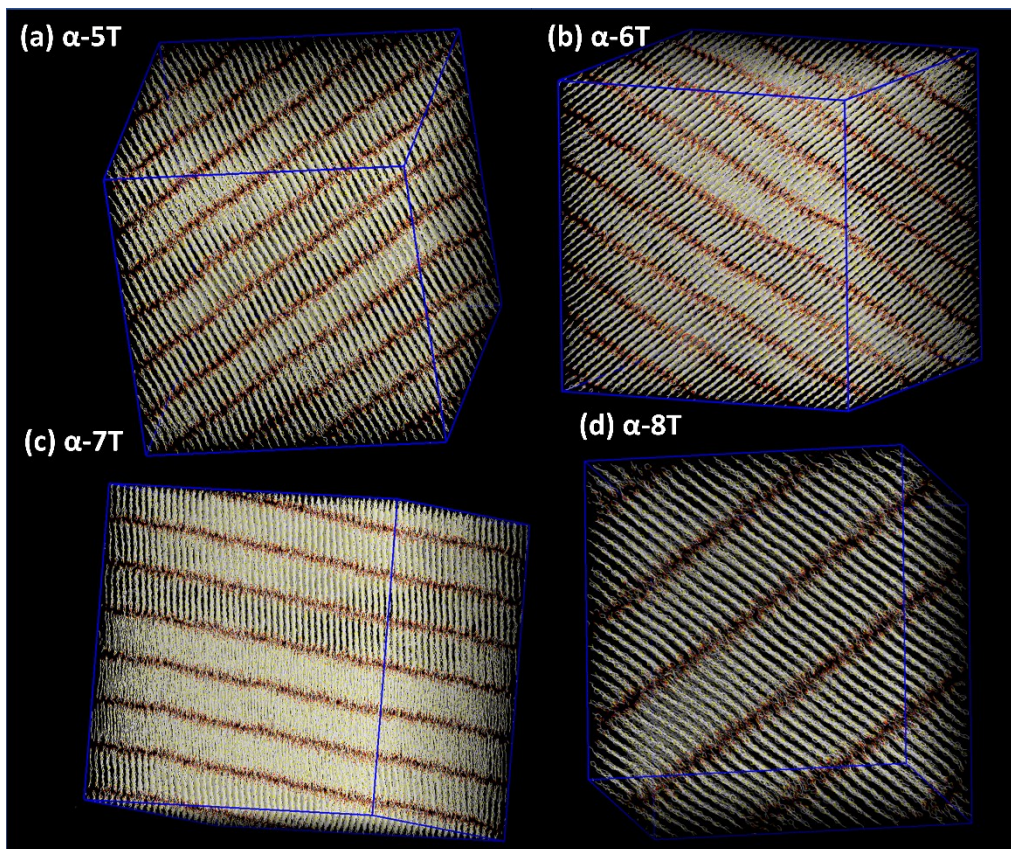

**Fig. S5** Characteristic atomistic snapshots of the crystal phases of: (a)  $\alpha$ -5T, (b)  $\alpha$ -6T, (c)  $\alpha$ -7T and (d)  $\alpha$ -8T, at  $T = 490$  K, 590 K, 640 K and 690 K, respectively, as obtained from our *NPT* MD simulations ( $P = 1$  atm).
